# Supplementary figures and images for: Current pesticide suicide surveillance methods used across the African continent: a scoping review protocol
Source: PubMed Central journal article supplement — BMJ Open. 2022 Aug 18;12(8):e055923. doi: 10.1136/bmjopen-2021-055923 (PMC9394204; doi:10.1136/bmjopen-2021-055923), 2022-08-18

**APPENDIX 1: Prisma flow diagram**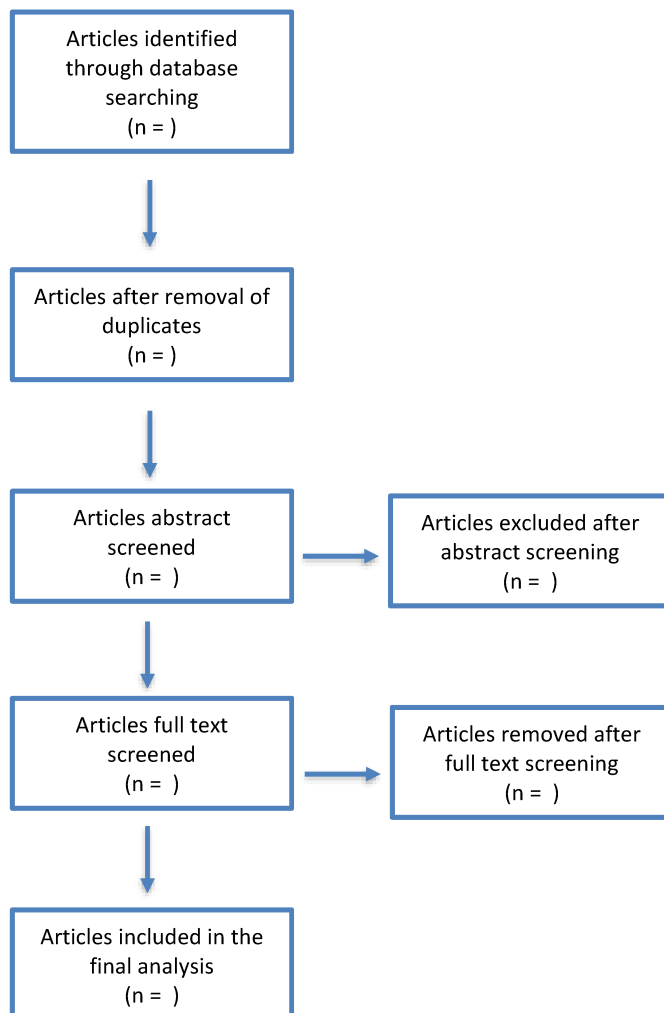

Supplement: bmjopen-2021-055923supp001.pdf [file bmjopen-2021-055923supp001.pdf]
